# Supplementary material for: Hydrophobic, low-loading and alkylated polystyrene-supported sulfonic acid for several organic reactions in water: remarkable effects of both the polymer structures and loading levels of sulfonic acidsElectronic supplementary information (ESI) available: Experimental details. See http://www.rsc.org/suppdata/ob/b3/b305622h/
Source: Royal Society of Chemistry journal article supplement (doi:10.1039/b305622h), 2003-01-01
Supplement: b305622h.doc [file b305622h.doc]

# Hydrophobic, Low-Loading and Alkylated Polystyrene-Supported Sulfonic Acid

# for Several Organic Reactions in Water: Remarkable Effects of Both the

# Polymer Structures and Loading Levels of Sulfonic Acids

Shinya Iimura, Kei Manabe, and Shu Kobayashi*

Graduate School of Pharmaceutical Sciences, The University of Tokyo, Hongo,

Bunkyo-ku, Tokyo 113-0033, Japan

# Supplementary data

**Experimental Section**

### General

NMR spectra were recorded on a JEOL JNM-LA300 or JNM-LA400 spectrometer. Tetramethylsilane (** = 0) was used as an internal standard for 1H NMR and CDCl3 (** = 77.0) for 13C NMR. Column chromatography was conducted on Silica gel 60 (Merck) and preparative thin-layer chromatography (TLC) was carried out using Wakogel B-5F. Structures of all compounds were confirmed by comparison with those of commercially available compounds or published data.

**Preparation of polymer-supported sulfonic acid**

**PS-SO3H 1:** To a suspension of polystyrene (10.06 g, 1% DVB cross-linked, 200–400 mesh) in dichloromethane (150 mL) was slowly added a solution of chlorosulfonic acid (0.37 mL) in dichloromethane (20 mL) at 0 ˚C, and the whole was shaken for 6 h. THF/water (5/1, 60 mL) was added, and after shaken at rt for 1 h and left overnight, the resin was collected on a glass filter, rinsed with water, water/THF, THF, and dichloromethane, and dried in vacuo to give the polymer-supported sulfonic acid (PS-SO3H **1**). From a result of elemental analysis (found: S, 1.48%), the sulfonic acid content was estimated as 0.46 mmol/g. PS-SO3H **1** with other loading levels were similarly prepared by changing the ratio of the polymer and chlorosulfonic acid. The ratios of the polymer and ClSO3H used, were 3.00 g/0.40 mL (polymer/ClSO3H) for **1** (1.55 mmol/g), 3.00 g/0.20 mL for **1** (0.76 mmol/g), 6.00 g/0.10 mL for **1** (0.21 mmol/g), 12.01 g/0.10 mL for **1** (0.12 mmol/g), respectively.

**PS-SO3H 2:** To a mixture of AlCl3 (4.01 g) in carbon disulfide (40 mL) were added polystyrene (2.08 g, 1% DVB cross-linked, 200–400 mesh) and a solution of stearoyl chloride (9.09 g) in carbon disulfide (5 mL) successively at rt. After stirring for 24 h, 1 N HCl (150 mL) was added to the reaction mixture. After stirring for 12 h at rt, the resin was collected on a glass filter, rinsed with 1 N HCl, water, water/THF, THF, and dichloromethane, and dried in vacuo. According to a result of elemental analysis, the acylation proceeded quantitatively. Anal. Calcd: C, 84.26; H, 11.42. Found: C, 84.49; H, 11.36. The resin was reduced in the following step. AlCl3 (4.01 g) was added to a mixture of LiAlH4 (1.14 g) in ether (100 mL) in several portions at 0 ˚C. After warming to rt, the resin (5.00 g) was added, and the whole was heated under reflux for 24 h. After cooling to 0 ˚C, 1 N HCl (150 mL) was added. The mixture was stirred for 24 h at rt, the resin was collected on a glass filter, rinsed with 1 N HCl, water, water/THF, THF, and dichloromethane, and dried in vacuo. According to a result of elemental analysis, the reduction proceeded quantitatively. Anal. Calcd: C, 87.56; H, 12.44. Found: C, 87.36; H, 12.42. The resin was next sulfonated as follows. To a suspension of the resin (4.00 g) in dichloromethane (50 mL) was slowly added a solution of chlorosulfonic acid (0.10 mL) in dichloromethane (10 mL) at 0 ˚C, and the whole was shaken for 6 h. AcOH/water (8/1, 45 mL) was added, and after shaken at rt for 1 h and left overnight, the resin was collected on a glass filter, rinsed with water, water/THF, THF, and dichloromethane, and dried in vacuo to give the polymer-supported sulfonic acid (PS-SO3H **2**). From a result of elemental analysis (found: S, 0.55%), the sulfonic acid content was estimated as 0.17 mmol/g. PS-SO3H **2** with other loading levels were similarly prepared by changing the ratio of the polymer and chlorosulfonic acid. The ratios of the polymer and ClSO3H used, were 2.00 g/0.30 mL (polymer/ClSO3H) for **2** (1.40 mmol/g), 0.724 g/0.080 mL for **2** (1.01 mmol/g), 2.00 g/0.20 mL for **2** (0.85 mmol/g), 2.00 g/0.10 mL for **2** (0.41 mmol/g), respectively.

**PS-SO3H 3:** PS-SO3H **3** was similarly prepared by the procedure shown in PS-SO3H **2**.

**PS-SO3H 4:** PS-SO3H **4** was also similarly prepared by the procedure shown in PS-SO3H **2**.

**PS-SO3H 5:** To a suspension of TentaGel S-Br (2.00 g, ~0.25 mmol Br/g) in dichloromethane (25 mL) was slowly added a solution of chlorosulfonic acid (0.10 mL) in dichloromethane (5 mL) at 0 ˚C, and the whole was shaken for 6 h. AcOH/water (10/1, 22 mL) was added, and after shaken at 0 ˚C for 1 h and left overnight, the resin was collected on a glass filter, rinsed with water, water/THF, THF, and dichloromethane, and dried in vacuo to give the polymer-supported sulfonic acid (PS-SO3H **5**). From a result of elemental analysis (found: S, 0.62%), the sulfonic acid content was estimated as 0.19 mmol/g.

**PS-SO3H 6:** To a suspension of ArgoPore Cl (800 mg, typical loading 0.6~1.1 mmol Cl/g) in dichloromethane (20 mL) was slowly added a solution of chlorosulfonic acid (0.027 mL) in dichloromethane (5 mL) at 0 ˚C, and the whole was shaken for 6 h. AcOH/water (10/1, 11 mL) was added, and after shaken at 0 ˚C for 1 h and left overnight, the resin was collected on a glass filter, rinsed with water, water/THF, THF, and dichloromethane, and dried in vacuo to give the polymer-supported sulfonic acid (PS-SO3H **6**). From a result of elemental analysis (found: S, 0.35%), the sulfonic acid content was estimated as 0.11 mmol/g.

**Typical procedure for PS-SO3H-catalyzed hydrolysis of dodecyl thiolaurate in water (Table 1).** A mixture of dodecyl thiolaurate (192.3 mg, 0.50 mmol) and the polymer-supported catalyst (PS-SO3H **2** (0.412 mmol/g), 121.4 mg, 0.050 mmol) in degassed water (3 mL) was stirred for 24 h under reflux conditions. The reaction mixture was quenched with saturated aq. NaHCO3 after cooled to rt. The polymer was filtered and washed with water and ethyl acetate. The organic layer was dried over Na2SO4 and evaporated. We obtained the crude product which included only the desired products and the starting material. Lauric acid was obtained (96.2 mg, 96% yield from the integration of 1H NMR).

**Recycling experiment of LL-ALPS-SO3H (Table 2).** A mixture of dodecyl thioacetate (122.5 mg, 0.50 mmol) and LL-ALPS-SO3H (29.2 mg, 0.0050 mmol) in degassed water (3 mL) was stirred for 24 h under reflux conditions. The mixture was filtered through a glass filter after the reaction mixture was cooled to rt, and the polymer was washed with water and ether. The organic layer was dried over Na2SO4 and evaporated. Dodecanethiol was obtained (95.1 mg, 94% yield from the integration of 1H NMR). The recovered LL-ALPS-SO3H was reused for the next reaction without loss of activity after dried in vacuo.

**Typical procedure for PS-SO3H-catalyzed deprotection of the ketal derived from 2-octanone in water (Table 3).** A mixture of the ketal (43.2 mg, 0.25 mmol) and LL-ALPS-SO3H (14.6 mg, 0.0025 mmol) in degassed water (1.5 mL) was stirred for 30 min at 40 ˚C. The reaction mixture was quenched with saturated aq. NaHCO3. The polymer was filtered and washed with water and ether. The organic layer was dried over Na2SO4 and evaporated. 2-Octanone was obtained (30.8 mg, 96% yield from the integration of 1H NMR using dibenzyl as an internal standard).

**LL-ALPS-SO3H-catalyzed deprotection of the ketal derived from acetophenone in water (Scheme 1).** A mixture of the ketal (41.4 mg, 0.25 mmol) and LL-ALPS-SO3H (14.6 mg, 0.0025 mmol) in degassed water (1.5 mL) was stirred for 30 min at 40 ˚C. The reaction mixture was quenched with saturated aq. NaHCO3. The polymer was filtered and washed with water and ether. The organic layer was dried over Na2SO4 and evaporated. Although the mixture contained only the desired product, the product was purified by passing through a silica gel pad (2 g). Acetophenone was obtained (28.8 mg, 96% yield).

**LL-ALPS-SO3H-catalyzed deprotection of the acetonide derived from 1,2-octanediol in water (Scheme 1).** A mixture of the acetonide (46.7 mg, 0.25 mmol) and LL-ALPS-SO3H (14.5 mg, 0.0025 mmol) in degassed water (1.5 mL) was stirred for 2 h at 40 ˚C. The reaction mixture was quenched with saturated aq. NaHCO3. The polymer was filtered and washed with water and ether. The organic layer was dried over Na2SO4 and evaporated. The mixture was purified by passing through a silica gel pad (3 g). 1,2-Octanediol was obtained (33.9 mg, 93% yield).

**LL-ALPS-SO3H-catalyzed transthioacetalization of the acetal derived from decanal in water (Scheme 1).** A mixture of the acetal (50.5 mg, 0.25 mmol), ethanedithiol (26.1 mg, 0.277 mmol), and LL-ALPS-SO3H (14.5 mg, 0.0025 mmol) in degassed water (1.5 mL) was stirred for 1 h at 40 ˚C. The reaction mixture was quenched with saturated aq. NaHCO3. The polymer was filtered and washed with water and ether. The organic layer was dried over Na2SO4 and evaporated. The mixture was purified by preparative TLC on silica gel to give 2-nonyl-1,3-dithiolane (55.4 mg, 95% yield).

**LL-ALPS-SO3H-catalyzed hydration of the epoxide derived from styrene in water (Scheme 1).** A mixture of the epoxide (30.4 mg, 0.25 mmol) and LL-ALPS-SO3H (14.5 mg, 0.0025 mmol) in degassed water (1.5 mL) was stirred for 30 min at 40 ˚C. The reaction mixture was filtered, washed with water, and concentrated. Styrene glycol was obtained quantitatively as an analytically pure form.

**LL-ALPS-SO3H-catalyzed hydration of 4-ethynyltoluene in water (Eq. 1).** A mixture of the alkyne (29.2 mg, 0.25 mmol) and LL-ALPS-SO3H (61.0 mg, 0.025 mmol) in degassed water (1.5 mL) was stirred for 48 h under reflux conditions. After cooled to rt, the polymer was filtered and washed with water and ether. The organic layer was dried over Na2SO4 and evaporated. The mixture was purified by preparative TLC on silica gel to give 4’-methylacetophenone (27.3 mg, 81% yield).
